# Supplementary material for: The Influence of Place of Residence, Gender and Age Influence on Food Group Choices in the Spanish Population: Findings from the ANIBES Study
Source: PubMed Central journal article supplement (PMC5946177; doi:10.3390/nu10040392), 2018-03-22
Supplement: nutrients-10-00392-s001.pdf [file nutrients-10-00392-s001.pdf]

## Supplementary Material

**Table S1. Food group classification and included subgroups assessed in the ANIBES Study**  
(Adapted from Pérez-Rodrigo et al. (1))

| <b>Food group</b>                        | <b>Included subgroups</b>                                                                                                                               |
|------------------------------------------|---------------------------------------------------------------------------------------------------------------------------------------------------------|
| <b>Cereals/Grains</b>                    | Grains and flours<br>Bread<br>Breakfast cereals and cereal bars<br>Pasta<br>Bakery and pastry                                                           |
| <b>Vegetables</b>                        | Including starchy tubers (i.e. potatoes)                                                                                                                |
| <b>Fruits</b>                            |                                                                                                                                                         |
| <b>Oils and fats</b>                     | Olive oil<br>Other oils<br>Butter, margarine and shortening                                                                                             |
| <b>Milk and dairy products</b>           | Milk<br>Cheese<br>Yogurt and fermented milk<br>Other dairy products                                                                                     |
| <b>Fish and Shellfish</b>                |                                                                                                                                                         |
| <b>Meat and meat products</b>            | Meat<br>Sausages and other meat products<br>Viscera and spoils                                                                                          |
| <b>Eggs</b>                              |                                                                                                                                                         |
| <b>Pulses</b>                            |                                                                                                                                                         |
| <b>Sugars and sweets</b>                 | Sugar<br>Chocolates<br>Jams and other<br>Other sweets                                                                                                   |
| <b>Appetizers</b>                        |                                                                                                                                                         |
| <b>Ready-to-eat-meals</b>                |                                                                                                                                                         |
| <b>Sauces and condiments</b>             |                                                                                                                                                         |
| <b>Non-alcoholic beverages</b>           | Water<br>Coffee and infusions<br>Sugar soft drinks<br>Non-sweetened soft drinks<br>Sports Drinks<br>Energy drinks<br>Juices and nectars<br>Other drinks |
| <b>Alcoholic beverages</b>               | Low alcohol content beverages<br>High alcohol content beverages                                                                                         |
| <b>Supplements and meal replacements</b> |                                                                                                                                                         |

1. Pérez-Rodrigo C, Gianzo-Citores M, Gil Á, González-Gross M, Ortega R, Serra-Majem L, et al. Lifestyle Patterns and Weight Status in Spanish Adults: The ANIBES Study. *Nutrients*. 2017;9 (6):606.

Table S2. Intake of major food groups (g/day) from the ANIBES Study amongst children (boys and girls, 9 to 12 years) segmented by geographical areas (Nielsen areas)

|                                                      | Barcelona<br>(Metropolitan Area) |                  | Canary<br>Islands |                  | Center           |                  | East              |                  | Madrid<br>(Metropolitan Area) |                  | Northeast        |                  | Northwest        |                  | North Central    |                  | South            |                  |
|------------------------------------------------------|----------------------------------|------------------|-------------------|------------------|------------------|------------------|-------------------|------------------|-------------------------------|------------------|------------------|------------------|------------------|------------------|------------------|------------------|------------------|------------------|
|                                                      | Boys                             | Girls            | Boys              | Girls            | Boys             | Girls            | Boys              | Girls            | Boys                          | Girls            | Boys             | Girls            | Boys             | Girls            | Boys             | Girls            | Boys             | Girls            |
| <b>n</b>                                             | 6                                | 2                | 7                 | 5                | 10               | 9                | 21                | 14               | 12                            | 9                | 15               | 10               | 9                | 6                | 10               | 14               | 36               | 18               |
| <b>Oils and Fats (g/day)</b>                         | 23.4<br>(6.8)                    | 15.3<br>(3.3)    | 28.2<br>(13.0)    | 14.6<br>(4.8)    | 19.2<br>(9.6)    | 27.4<br>(11.4)   | 23.9<br>(6.3)     | 21.2<br>(9.8)    | 19.7<br>(10.2)                | 23.5<br>(5.6)    | 23.4<br>(10.0)   | 25.5<br>(9.4)    | 19.5<br>(11.0)   | 20.9<br>(6.5)    | 29.3<br>(9.6)    | 25.3<br>(7.0)    | 22.9<br>(10.9)   | 22.2<br>(9.6)    |
| <b>Appetizers (g/day)</b>                            | 4.2<br>(6.3)                     | 17.3<br>(22.6)   | 15.8<br>(20.3)    | 14.5<br>(20.6)   | 0.2<br>(0.6)     | 1.1<br>(3.3)     | 5.1<br>(11.1)     | 2.8<br>(5.3)     | 3.6<br>(8.1)                  | 6.1<br>(15.9)    | 2.7<br>(5.2)     | 0.3<br>(0.8)     | 3.0<br>(5.8)     | 6.5<br>(11.0)    | 3.6<br>(6.7)     | 4.7<br>(7.8)     | 6.7<br>(10.3)    | 7.2<br>(12.1)    |
| <b>Sugars and sweets (g/day)</b>                     | 16.6<br>(10.1)                   | 30.3<br>(28.8)   | 32.7<br>(25.4)    | 6.9<br>(7.9)     | 19.8<br>(10.0)   | 21.8<br>(10.6)   | 27.1<br>(19.3)    | 20.1<br>(15.3)   | 24.5<br>(19.4)                | 29.9<br>(16.0)   | 35.4<br>(36.8)   | 28.7<br>(23.4)   | 16.9<br>(12.9)   | 24.3<br>(14.5)   | 21.0<br>(14.4)   | 33.1<br>(20.6)   | 21.9<br>(18.6)   | 23.5<br>(19.6)   |
| <b>Alcoholic<br/>beverages (g/day)</b>               | 0.0<br>(0.0)                     | 0.0<br>(0.0)     | 0.0<br>(0.0)      | 0.0<br>(0.0)     | 0.0<br>(0.0)     | 0.0<br>(0.0)     | 0.0<br>(0.0)      | 0.0<br>(0.0)     | 0.0<br>(0.0)                  | 0.0<br>(0.0)     | 0.0<br>(0.0)     | 0.0<br>(0.0)     | 0.0<br>(0.0)     | 0.0<br>(0.0)     | 0.0<br>(0.0)     | 0.0<br>(0.0)     | 0.0<br>(0.0)     | 0.0<br>(0.0)     |
| <b>Non-alcoholic<br/>beverages (g/day)</b>           | 786.1<br>(319.8)                 | 525.0<br>(450.2) | 1177.8<br>(594.7) | 668.7<br>(201.4) | 561.7<br>(310.2) | 725.5<br>(347.5) | 932.8*<br>(477.3) | 764.7<br>(524.9) | 661.6<br>(462.2)              | 640.7<br>(305.9) | 733.4<br>(332.7) | 641.6<br>(360.5) | 427.2<br>(303.9) | 705.1<br>(186.6) | 680.0<br>(354.4) | 532.8<br>(352.9) | 667.3<br>(421.9) | 748.6<br>(376.5) |
| <b>Meat and<br/>meat products (g/day)</b>            | 224.4<br>(155.5)                 | 107.5<br>(107.2) | 132.4<br>(55.7)   | 92.0<br>(28.4)   | 153.4<br>(42.2)  | 137.7<br>(66.6)  | 168.3<br>(73.4)   | 142.3<br>(78.9)  | 158.6<br>(70.3)               | 161.6<br>(58.9)  | 162.3<br>(68.1)  | 133.3<br>(35.4)  | 150.1<br>(58.4)  | 129.5<br>(82.0)  | 155.1<br>(51.0)  | 140.6<br>(45.7)  | 152.7<br>(75.2)  | 116.2<br>(61.5)  |
| <b>Cereals/Grains (g/day)</b>                        | 187.5<br>(51.3)                  | 191.0<br>(150.4) | 218.6<br>(93.5)   | 124.0<br>(25.7)  | 149.2<br>(36.4)  | 141.5<br>(47.4)  | 176.3<br>(54.6)   | 166.4<br>(59.8)  | 139.2<br>(51.1)               | 157.0<br>(57.9)  | 196.8<br>(64.3)  | 203.7<br>(71.3)  | 164.0<br>(63.1)  | 145.3<br>(46.9)  | 170.1<br>(35.5)  | 174.9<br>(42.4)  | 160.0<br>(62.3)  | 171.9<br>(60.8)  |
| <b>Fruits (g/day)</b>                                | 126.6<br>(100.7)                 | 30.0<br>(42.4)   | 124.4<br>(116.1)  | 44.7<br>(61.4)   | 99.8<br>(91.4)   | 139.3<br>(124.9) | 97.0<br>(83.8)    | 72.5<br>(79.7)   | 135.4<br>(107.3)              | 197.0<br>(165.4) | 69.1<br>(58.7)   | 160.4<br>(175.9) | 100.8<br>(124.3) | 105.7<br>(92.9)  | 146.0<br>(110.5) | 145.5<br>(73.5)  | 69.0<br>(93.9)   | 87.5<br>(79.1)   |
| <b>Eggs (g/day)</b>                                  | 29.1<br>(19.5)                   | 2.7<br>(3.8)     | 24.0<br>(34.0)    | 28.6<br>(34.5)   | 22.6<br>(23.7)   | 30.4<br>(20.6)   | 28.8<br>(31.4)    | 21.0<br>(19.6)   | 25.3<br>(23.5)                | 24.8<br>(13.1)   | 19.3<br>(23.6)   | 21.3<br>(23.0)   | 31.5<br>(37.4)   | 36.2<br>(42.6)   | 39.0<br>(18.1)   | 34.1<br>(18.1)   | 29.3<br>(22.4)   | 23.5<br>(20.8)   |
| <b>Milk and<br/>dairy products (g/day)</b>           | 320.2<br>(95.5)                  | 232.5<br>(100.2) | 480.0<br>(127.8)  | 171.0<br>(161.8) | 272.5<br>(129.7) | 300.4<br>(99.0)  | 432.3<br>(147.5)  | 305.8<br>(136.3) | 391.5<br>(119.8)              | 357.2<br>(96.5)  | 421.9<br>(176.3) | 322.4<br>(180.2) | 443.6<br>(201.8) | 282.8<br>(102.4) | 415.7<br>(109.4) | 364.8<br>(145.3) | 337.4<br>(131.3) | 374.4<br>(187.7) |
| <b>Pulses (g/day)</b>                                | 4.2<br>(10.2)                    | 16.7<br>(9.4)    | 9.5<br>(11.3)     | 16.0<br>(13.6)   | 16.5<br>(19.0)   | 14.8<br>(20.3)   | 6.2<br>(9.3)      | 8.1<br>(10.4)    | 16.0<br>(13.5)                | 15.3<br>(18.3)   | 6.6<br>(10.4)    | 9.8<br>(11.4)    | 7.8<br>(12.5)    | 16.4<br>(11.5)   | 26.5<br>(24.5)   | 19.8<br>(13.4)   | 10.5<br>(13.8)   | 12.6<br>(10.8)   |
| <b>Fish and shellfish (g/day)</b>                    | 26.2<br>(32.8)                   | 35.3<br>(23.6)   | 39.0<br>(49.5)    | 13.5<br>(18.6)   | 48.3<br>(49.0)   | 59.0<br>(59.0)   | 65.8<br>(64.5)    | 39.4<br>(41.8)   | 22.2<br>(38.8)                | 60.8<br>(41.5)   | 23.9<br>(30.5)   | 21.1<br>(24.7)   | 48.5<br>(46.2)   | 60.0<br>(62.8)   | 71.2<br>(130.5)  | 43.0<br>(45.5)   | 47.0<br>(49.1)   | 53.2<br>(56.9)   |
| <b>Ready-to-eat meals (g/day)</b>                    | 143.8<br>(131.2)                 | 20.0<br>(28.3)   | 96.9<br>(96.0)    | 77.0<br>(39.2)   | 80.4<br>(61.1)   | 65.6<br>(73.5)   | 89.7<br>(65.8)    | 102.6<br>(96.8)  | 106.5<br>(72.2)               | 28.1<br>(28.0)   | 99.8<br>(74.4)   | 104.8<br>(128.3) | 58.8<br>(35.1)   | 55.2<br>(36.3)   | 77.4<br>(61.3)   | 65.7<br>(69.2)   | 80.6<br>(73.1)   | 81.8<br>(68.9)   |
| <b>Sauces and<br/>condiments (g/day)</b>             | 13.1<br>(9.2)                    | 1.8<br>(2.5)     | 9.4<br>(5.3)      | 10.1<br>(11.4)   | 10.3<br>(9.8)    | 7.2<br>(7.5)     | 14.2<br>(13.2)    | 22.9<br>(13.8)   | 16.4<br>(17.4)                | 9.3<br>(8.1)     | 12.4<br>(9.2)    | 15.1<br>(11.0)   | 23.3<br>(18.2)   | 18.9<br>(27.8)   | 8.1<br>(7.1)     | 28.0<br>(31.7)   | 16.6<br>(13.6)   | 21.2<br>(27.9)   |
| <b>Supplements and<br/>meal replacements (g/day)</b> | 0.0<br>(0.0)                     | 0.0<br>(0.0)     | 0.0<br>(0.0)      | 0.0<br>(0.0)     | 0.0<br>(0.0)     | 0.0<br>(0.0)     | 0.0<br>(0.0)      | 0.0<br>(0.0)     | 0.0<br>(0.0)                  | 0.0<br>(0.0)     | 0.0<br>(0.0)     | 0.0<br>(0.0)     | 0.0<br>(0.0)     | 0.0<br>(0.0)     | 0.0<br>(0.0)     | 0.0<br>(0.0)     | 0.1<br>(0.5)     | 0.0<br>(0.0)     |
| <b>Vegetables (g/day)</b>                            | 97.7<br>(51.6)                   | 156.7<br>(14.1)  | 154.6<br>(63.5)   | 120.9<br>(76.9)  | 123.2<br>(100.0) | 142.2<br>(137.6) | 117.4<br>(71.8)   | 112.9<br>(82.7)  | 121.5<br>(101.7)              | 205.1<br>(213.9) | 141.7<br>(87.2)  | 168.7<br>(84.7)  | 96.6<br>(37.8)   | 132.9<br>(58.4)  | 155.7<br>(109.3) | 122.5<br>(112.4) | 106.3<br>(64.8)  | 86.1<br>(67.9)   |

Data reported as means (standard error of the mean, SEM) per group. \* p<0.05 difference Northwest (male) (Games-Howell test) \*\* p<0.01 difference Central (male)

(Games Howell test).

**Table S3. Intake of major food groups (g/day) from the ANIBES Study amongst children (boys and girls, 9 to 12 years) assessed by habitat size: rural, semi-urban and urban.**

|                                                  | Rural            |                  | Semi-urban        |                  | Urban            |                  |
|--------------------------------------------------|------------------|------------------|-------------------|------------------|------------------|------------------|
|                                                  | <i>Boys</i>      | <i>Girls</i>     | <i>Boys</i>       | <i>Girls</i>     | <i>Boys</i>      | <i>Girls</i>     |
| <b>n</b>                                         | <b>46</b>        | <b>33</b>        | <b>50</b>         | <b>30</b>        | <b>30</b>        | <b>24</b>        |
| <b>Oils and Fats (g/day)</b>                     | 22.9<br>(10.2)   | 22.8<br>(9.2)    | 24.8<br>(10.1)    | 24.8<br>(9.0)    | 20.8<br>(9.0)    | 20.7<br>(7.9)    |
| <b>Appetizers (g/day)</b>                        | 5.7<br>(9.9)     | 4.8<br>(8.7)     | 5.7<br>(11.3)     | 6.1<br>(12.0)    | 3.0<br>(6.3)     | 4.5<br>(11.8)    |
| <b>Sugars and sweets (g/day)</b>                 | 28.6<br>(24.0)   | 25.9<br>(21.0)   | 23.5<br>(20.5)    | 25.2<br>(17.8)   | 19.3<br>(15.4)   | 22.9<br>(15.1)   |
| <b>Alcoholic beverages (g/day)</b>               | 0.0<br>(0.0)     | 0.0<br>(0.0)     | 0.0<br>(0.0)      | 0.0<br>(0.0)     | 0.0<br>(0.0)     | 0.0<br>(0.0)     |
| <b>Non-alcoholic beverages (g/day)</b>           | 709.7<br>(417.6) | 650.8<br>(381.6) | 710.8<br>(476.8)  | 684.7<br>(389.3) | 786.3<br>(396.2) | 706.6<br>(331.1) |
| <b>Meat and meat products (g/day)</b>            | 135.0<br>(51.9)  | 132.0<br>(60.3)  | 171.1*<br>(85.8)  | 143.6<br>(64.5)  | 177.1*<br>(69.7) | 119.5<br>(57.0)  |
| <b>Cereals/Grains (g/day)</b>                    | 165.8<br>(60.0)  | 153.6<br>(51.8)  | 173.6<br>(57.2)   | 180.7<br>(49.3)  | 170.0<br>(66.6)  | 165.9<br>(74.2)  |
| <b>Fruits (g/day)</b>                            | 100.2<br>(95.6)  | 144.2<br>(133.0) | 90.4<br>(100.6)   | 92.3<br>(67.9)   | 101.6<br>(91.9)  | 110.3<br>(127.9) |
| <b>Eggs (g/day)</b>                              | 28.2<br>(27.9)   | 31.3<br>(26.2)   | 30.0<br>(26.6)    | 26.4<br>(19.4)   | 23.2<br>(19.9)   | 18.5<br>(19.0)   |
| <b>Milk and dairy products (g/day)</b>           | 342.7<br>(127.2) | 345.4<br>(157.7) | 418.1*<br>(169.8) | 280.5<br>(123.1) | 391.4<br>(129.4) | 353.1<br>(165.9) |
| <b>Pulses (g/day)</b>                            | 8.0<br>(12.3)    | 12.3<br>(12.2)   | 10.6<br>(17.0)    | 15.1<br>(14.0)   | 16.3<br>(13.2)   | 14.2<br>(14.8)   |
| <b>Fish and shellfish (g/day)</b>                | 50.4<br>(67.8)   | 49.6<br>(55.0)   | 46.7<br>(53.9)    | 38.0<br>(45.3)   | 36.9<br>(55.2)   | 46.8<br>(37.9)   |
| <b>Ready-to-eat meals (g/day)</b>                | 75.3<br>(67.5)   | 74.0<br>(69.6)   | 87.9<br>(71.5)    | 72.8<br>(88.5)   | 111.6<br>(79.8)  | 77.2<br>(79.2)   |
| <b>Sauces and condiments (g/day)</b>             | 13.9<br>(13.7)   | 16.8<br>(16.7)   | 14.7<br>(12.4)    | 18.5<br>(24.6)   | 14.6<br>(12.8)   | 18.8<br>(23.9)   |
| <b>Supplements and meal replacements (g/day)</b> | 0.0<br>(0.0)     | 0.0<br>(0.0)     | 0.1<br>(0.4)      | 0.0<br>(0.0)     | 0.0<br>(0.0)     | 0.0<br>(0.0)     |
| <b>Vegetables (g/day)</b>                        | 103.7<br>(61.2)  | 133.2<br>(107.2) | 127.5<br>(81.2)   | 115.8<br>(66.9)  | 135.2<br>(92.1)  | 145.9<br>(155.1) |

Data reported as means (standard error of the mean, SEM) per group. \* p<0.05 difference rural (Games-Howell test).

**Table S4. Intake of major food groups (g/day) from the ANIBES Study amongst adolescents (male/female, 13 to 17 years) segmented by geographical areas (Nielsen areas).**

|                                                  | Barcelona<br>(Metropolitan Area) |                  | Canary Islands   |                  | Center           |                  | East             |                  | Madrid<br>(Metropolitan Area) |                   | Northeast        |                  | Northwest        |                  | North Central    |                  | South            |                  |
|--------------------------------------------------|----------------------------------|------------------|------------------|------------------|------------------|------------------|------------------|------------------|-------------------------------|-------------------|------------------|------------------|------------------|------------------|------------------|------------------|------------------|------------------|
|                                                  | Male                             | Female           | Male             | Female           | Male             | Female           | Male             | Female           | Male                          | Female            | Male             | Female           | Male             | Female           | Male             | Female           | Male             | Female           |
| <b>n</b>                                         | 5                                | 2                | 8                | 5                | 15               | 11               | 32               | 10               | 10                            | 7                 | 15               | 3                | 19               | 11               | 12               | 6                | 21               | 19               |
| <b>Oils and Fats (g/day)</b>                     | 23.6<br>(12.4)                   | 26.8<br>(22.4)   | 26.4<br>(17.0)   | 15.6<br>(7.1)    | 24.6<br>(12.7)   | 18.4<br>(10.4)   | 20.8<br>(9.2)    | 16.0<br>(6.0)    | 19.8<br>(14.1)                | 16.1<br>(8.0)     | 24.2<br>(10.0)   | 24.1<br>(16.1)   | 22.3<br>(17.5)   | 23.8<br>(7.6)    | 25.2<br>(15.6)   | 22.6<br>(12.4)   | 23.7<br>(11.2)   | 24.4<br>(15.7)   |
| <b>Appetizers (g/day)</b>                        | 6.0<br>(8.9)                     | 1.7<br>(2.4)     | 7.7<br>(19.3)    | 1.0<br>(2.2)     | 4.0<br>(11.8)    | 1.5<br>(5.3)     | 7.5<br>(17.4)    | 2.3<br>(3.5)     | 4.3<br>(8.3)                  | 9.7<br>(14.5)     | 7.8<br>(11.7)    | 0.0<br>(0.0)     | 0.9<br>(2.4)     | 4.8<br>(8.3)     | 6.8<br>(11.5)    | 16.1<br>(19.6)   | 4.1<br>(9.3)     | 10.3<br>(18.5)   |
| <b>Sugars and sweets (g/day)</b>                 | 15.2<br>(7.5)                    | 17.2<br>(9.2)    | 23.7<br>(19.7)   | 6.5<br>(2.9)     | 25.5<br>(21.9)   | 28.6<br>(18.1)   | 23.1<br>(16.1)   | 34.0<br>(39.6)   | 17.0<br>(11.7)                | 16.5<br>(10.0)    | 15.3<br>(13.5)   | 22.8<br>(2.0)    | 17.1<br>(13.0)   | 24.9<br>(18.4)   | 22.2<br>(21.8)   | 33.9<br>(36.9)   | 22.2<br>(16.0)   | 20.9<br>(15.4)   |
| <b>Alcoholic beverages (g/day)</b>               | 0.0<br>(0.0)                     | 0.0<br>(0.0)     | 0.0<br>(0.0)     | 0.0<br>(0.0)     | 0.0<br>(0.0)     | 15.2<br>(50.3)   | 0.0<br>(0.0)     | 5.0<br>(15.8)    | 0.0<br>(0.0)                  | 0.0<br>(0.0)      | 0.0<br>(0.0)     | 0.0<br>(0.0)     | 0.0<br>(0.0)     | 0.0<br>(0.0)     | 0.0<br>(0.0)     | 0.0<br>(0.0)     | 7.4<br>(33.8)    | 0.0<br>(0.0)     |
| <b>Non-alcoholic beverages (g/day)</b>           | 508.7<br>(435.2)                 | 698.3<br>(101.4) | 646.9<br>(471.4) | 575.3<br>(293.9) | 608.3<br>(302.8) | 691.7<br>(210.0) | 849.1<br>(495.8) | 772.2<br>(421.5) | 758.7<br>(283.8)              | 724.43<br>(475.7) | 607.6<br>(284.2) | 571.1<br>(101.8) | 719.6<br>(519.8) | 531.3<br>(284.8) | 788.8<br>(443.9) | 565.3<br>(169.4) | 664.8<br>(346.0) | 743.6<br>(271.3) |
| <b>Meat and meat products (g/day)</b>            | 198.1<br>(120.8)                 | 169.2<br>(53.0)  | 144.0<br>(55.2)  | 106.0<br>(70.6)  | 184.9<br>(87.8)  | 134.6<br>(66.2)  | 157.1<br>(66.4)  | 144.1<br>(69.2)  | 190.7<br>(89.0)               | 116.3<br>(53.7)   | 199.8<br>(56.3)  | 101.7<br>(54.1)  | 156.0<br>(66.9)  | 148.7<br>(81.6)  | 178.2<br>(66.9)  | 134.0<br>(80.1)  | 167.8<br>(64.5)  | 141.6<br>(62.4)  |
| <b>Cereals/Grains (g/day)</b>                    | 170.3<br>(56.9)                  | 204.2<br>(20.0)  | 181.1<br>(33.6)  | 147.1<br>(69.5)  | 202.2<br>(69.8)  | 148.5<br>(58.9)  | 206.7<br>(73.5)  | 190.3<br>(80.0)  | 174.0<br>(104.4)              | 105.2<br>(56.4)   | 228.0<br>(72.2)  | 101.7<br>(43.1)  | 176.3<br>(63.7)  | 191.3<br>(69.1)  | 174.2<br>(75.9)  | 173.1<br>(45.8)  | 183.1<br>(86.1)  | 152.3<br>(46.3)  |
| <b>Fruits (g/day)</b>                            | 12.8<br>(24.7)                   | 244.7<br>(180.0) | 158.2<br>(152.5) | 96.0<br>(85.5)   | 107.7<br>(165.1) | 111.9<br>(109.5) | 63.0<br>(74.2)   | 143.6<br>(209.7) | 52.3<br>(75.8)                | 61.9<br>(69.3)    | 79.2<br>(128.6)  | 74.6<br>(70.4)   | 116.6<br>(156.3) | 84.4<br>(77.5)   | 104.5<br>(134.0) | 67.8<br>(85.8)   | 52.0<br>(60.6)   | 78.4<br>(69.5)   |
| <b>Eggs (g/day)</b>                              | 33.2<br>(10.9)                   | 1.7<br>(2.4)     | 14.0<br>(19.1)   | 25.6<br>(46.3)   | 35.3<br>(19.4)   | 16.3<br>(10.9)   | 37.2<br>(40.1)   | 11.4<br>(18.3)   | 28.9<br>(28.9)                | 13.6<br>(12.0)    | 39.9<br>(57.3)   | 18.7<br>(4.6)    | 34.2<br>(30.6)   | 36.4<br>(27.3)   | 47.1<br>(44.1)   | 34.9<br>(42.7)   | 31.4<br>(32.3)   | 35.1<br>(36.6)   |
| <b>Milk and dairy products (g/day)</b>           | 286.0<br>(108.9)                 | 295.8<br>(8.3)   | 457.5<br>(267.9) | 246.3<br>(230.4) | 375.9<br>(235.9) | 215.9<br>(162.2) | 321.3<br>(210.4) | 212.6<br>(186.0) | 273.5<br>(207.1)              | 220.2<br>(124.2)  | 291.2<br>(114.3) | 328.2<br>(198.9) | 362.1<br>(175.0) | 297.0<br>(99.6)  | 235.9<br>(130.8) | 319.5<br>(163.5) | 362.4<br>(229.5) | 279.6<br>(157.2) |
| <b>Pulses (g/day)</b>                            | 6.7<br>(14.9)                    | 13.3<br>(18.9)   | 11.0<br>(18.8)   | 12.0<br>(14.5)   | 21.7<br>(17.5)   | 16.1<br>(23.8)   | 6.7<br>(10.5)    | 13.4<br>(15.8)   | 15.3<br>(20.9)                | 5.7<br>(7.1)      | 6.7<br>(11.1)    | 23.3<br>(6.7)    | 12.5<br>(16.5)   | 14.3<br>(27.6)   | 14.4<br>(15.9)   | 11.1<br>(17.7)   | 15.4<br>(14.7)   | 8.9<br>(13.0)    |
| <b>Fish and shellfish (g/day)</b>                | 26.7<br>(20.6)                   | 98.7<br>(139.5)  | 23.0<br>(25.9)   | 44.8<br>(33.2)   | 42.1<br>(42.4)   | 16.2<br>(22.9)   | 55.1<br>(68.5)   | 12.2<br>(28.2)   | 41.1<br>(51.1)                | 95.5<br>(97.4)    | 31.3<br>(40.5)   | 67.8<br>(74.9)   | 46.0<br>(86.2)   | 50.3<br>(88.1)   | 29.8<br>(29.7)   | 8.7<br>(14.1)    | 32.2<br>(41.5)   | 40.9<br>(54.2)   |
| <b>Ready-to-eat meals (g/day)</b>                | 81.8<br>(56.9)                   | 0.0<br>(0.0)     | 95.5<br>(87.4)   | 84.0<br>(117.0)  | 107.0<br>(82.5)  | 69.7<br>(64.6)   | 121.7<br>(110.9) | 74.2<br>(83.7)   | 109.6<br>(79.6)               | 114.3<br>(57.2)   | 119.3<br>(146.7) | 102.5<br>(99.7)  | 103.4<br>(130.6) | 62.4<br>(67.7)   | 104.2<br>(54.4)  | 82.8<br>(75.3)   | 92.9<br>(81.9)   | 66.6<br>(67.7)   |
| <b>Sauces and condiments (g/day)</b>             | 41.4<br>(25.6)                   | 5.3<br>(3.9)     | 14.3<br>(12.2)   | 12.3<br>(12.7)   | 13.2<br>(13.3)   | 12.6<br>(11.1)   | 20.5<br>(15.4)   | 23.5<br>(37.0)   | 12.0<br>(6.1)                 | 11.2<br>(9.7)     | 15.2<br>(11.8)   | 5.2<br>(5.0)     | 10.1<br>(9.2)    | 13.8<br>(11.5)   | 13.7<br>(11.6)   | 13.0<br>(10.4)   | 15.3<br>(11.4)   | 15.3<br>(12.2)   |
| <b>Supplements and meal replacements (g/day)</b> | 0.00<br>(0.0)                    | 0.00<br>(0.0)    | 2.5<br>(7.1)     | 0.00<br>(0.0)    | 0.00<br>(0.0)    | 0.00<br>(0.0)    | 0.00<br>(0.0)    | 0.00<br>(0.0)    | 0.00<br>(0.0)                 | 0.00<br>(0.0)     | 0.7<br>(2.6)     | 0.00<br>(0.0)    | 0.00<br>(0.0)    | 0.00<br>(0.0)    | 0.00<br>(0.0)    | 0.00<br>(0.0)    | 0.00<br>(0.0)    | 0.00<br>(0.0)    |
| <b>Vegetables (g/day)</b>                        | 133.1<br>(98.9)                  | 243.8<br>(71.0)  | 140.6<br>(89.8)  | 124.0<br>(91.9)  | 136.0<br>(104.6) | 103.0<br>(54.6)  | 102.7<br>(78.5)  | 98.4<br>(48.6)   | 113.4<br>(105.2)              | 120.0<br>(51.1)   | 115.0<br>(55.4)  | 184.4<br>(131.3) | 122.2<br>(78.7)  | 133.5<br>(80.9)  | 156.9<br>(138.7) | 113.4<br>(64.5)  | 131.6<br>(89.3)  | 109.4<br>(86.1)  |

Data reported as means (standard error of the mean, SEM) per group.

**Table S5. Intake of major food groups (g/day) from the ANIBES Study amongst adolescents (male/female, 13 to 17 years) assessed by habitat size: rural, semi-urban and urban.**

|                                                  | Rural              |                  | Semi-urban       |                  | Urban            |                  |
|--------------------------------------------------|--------------------|------------------|------------------|------------------|------------------|------------------|
|                                                  | Male               | Female           | Male             | Female           | Male             | Female           |
| <b>n</b>                                         | 58                 | 23               | 46               | 33               | 33               | 18               |
| <b>Oils and Fats (g/day)</b>                     | 22.9<br>(11.7)     | 19.8<br>(13.6)   | 22.7<br>(14.6)   | 21.3<br>(11.7)   | 23.5<br>(11.7)   | 21.2<br>(8.9)    |
| <b>Appetizers (g/day)</b>                        | 6.5<br>(12.9)      | 9.0<br>(16.8)    | 4.1<br>(10.0)    | 4.9<br>(10.5)    | 5.2<br>(14.4)    | 5.0<br>(11.1)    |
| <b>Sugars and sweets (g/day)</b>                 | 24.4<br>(18.6)     | 25.8<br>(17.1)   | 19.2<br>(14.6)   | 27.3<br>(28.4)   | 16.6<br>(13.5)   | 15.8<br>(13.0)   |
| <b>Alcoholic beverages (g/day)</b>               | 0.0<br>(0.0)       | 0.0<br>(0.0)     | 3.4<br>(22.9)    | 5.1<br>(29.0)    | 0.0<br>(0.0)     | 2.8<br>(11.8)    |
| <b>Non-alcoholic beverages (g/day)</b>           | 647.4<br>(339.5)   | 626.9<br>(239.4) | 807.0<br>(461.5) | 652.8<br>(263.0) | 701.2<br>(467.6) | 766.2<br>(416.4) |
| <b>Meat and meat products (g/day)</b>            | 170.7<br>(75.6)    | 144.3<br>(66.9)  | 164.2<br>(63.3)  | 126.1<br>(66.5)  | 182.5<br>(75.1)  | 142.2<br>(65.1)  |
| <b>Cereals/Grains (g/day)</b>                    | 203.1*<br>(58.2)   | 182.8<br>(68.4)  | 202.3<br>(85.5)  | 150.0<br>(56.7)  | 160.8<br>(77.1)  | 144.6<br>(62.3)  |
| <b>Fruits (g/day)</b>                            | 102.6<br>(149.6)   | 92.6<br>(96.9)   | 69.1<br>(81.6)   | 94.2<br>(102.1)  | 63.8<br>(86.7)   | 104.3<br>(143.6) |
| <b>Eggs (g/day)</b>                              | 36.0<br>(40.5)     | 31.4<br>(36.6)   | 29.5<br>(24.5)   | 22.4<br>(25.4)   | 39.7<br>(41.2)   | 21.7<br>(26.0)   |
| <b>Milk and dairy products (g/day)</b>           | 365.1<br>(221.3)   | 270.7<br>(149.8) | 331.4<br>(176.3) | 265.9<br>(150.0) | 273.1<br>(183.1) | 241.5<br>(176.4) |
| <b>Pulses (g/day)</b>                            | 11.5<br>(14.8)     | 8.8<br>(14.7)    | 12.5<br>(15.0)   | 13.9<br>(16.4)   | 12.3<br>(17.0)   | 13.4<br>(23.1)   |
| <b>Fish and shellfish (g/day)</b>                | 39.8<br>(45.5)     | 36.3<br>(47.7)   | 48.4<br>(74.4)   | 36.6<br>(63.5)   | 29.2<br>(36.4)   | 51.9<br>(78.7)   |
| <b>Ready-to-eat meals (g/day)</b>                | 102.4**<br>(104.6) | 43.2**<br>(44.9) | 113.9<br>(106.2) | 97.8<br>(82.4)   | 107.4<br>(89.8)  | 70.3<br>(69.3)   |
| <b>Sauces and condiments (g/day)</b>             | 14.3<br>(12.3)     | 13.3<br>(10.8)   | 17.4<br>(12.8)   | 11.8<br>(11.3)   | 17.2<br>(17.7)   | 20.2<br>(27.9)   |
| <b>Supplements and meal replacements (g/day)</b> | 0.3<br>(2.6)       | 0.0<br>(0.0)     | 0.2<br>(1.5)     | 0.0<br>(0.0)     | 0.0<br>(0.0)     | 0.0<br>(0.0)     |
| <b>Vegetables (g/day)</b>                        | 128.5<br>(100.0)   | 121.6<br>(84.9)  | 108.4<br>(76.5)  | 114.1<br>(63.4)  | 136.5<br>(88.3)  | 126.7<br>(86.0)  |

Data reported as means (standard error of the mean, SEM) per group.\* p<0.05 difference urban (Games-Howell test); \*\* p<0.01 difference semi-urban (Games-Howell test).

**Table S6. Intake of major food groups (g/day) from the ANIBES Study amongst adult population (male/female, 18 to 64 years) segmented by geographical areas (Nielsen areas)**

|                                                  | Barcelona<br>(Metropolitan Area) |                  | Canary<br>Islands |                  | Center                      |                                | East                          |                               | Madrid<br>(Metropolitan Area) |                  | Northeast        |                  | Northwest        |                                 | North Central     |                  | South            |                                 |
|--------------------------------------------------|----------------------------------|------------------|-------------------|------------------|-----------------------------|--------------------------------|-------------------------------|-------------------------------|-------------------------------|------------------|------------------|------------------|------------------|---------------------------------|-------------------|------------------|------------------|---------------------------------|
|                                                  | Male                             | Female           | Male              | Female           | Male                        | Female                         | Male                          | Female                        | Male                          | Female           | Male             | Female           | Male             | Female                          | Male              | Female           | Male             | Female                          |
| <b>n</b>                                         | 46                               | 63               | 32                | 42               | 89                          | 73                             | 132                           | 139                           | 108                           | 109              | 88               | 102              | 73               | 67                              | 64                | 77               | 166              | 185                             |
| <b>Oils and Fats (g/day)</b>                     | 23.4<br>(9.6)                    | 25.5<br>(11.7)   | 22.7<br>(10.0)    | 19.8**<br>(8.9)  | 26.4<br>(12.4)              | 22.1**<br>(11.0)               | 24.1<br>(10.9)                | 23.4**<br>(9.1)               | 22.4<br>(9.3)                 | 23.3**<br>(11.4) | 26.1<br>(12.1)   | 23.8<br>(11.2)   | 23.3<br>(11.3)   | 21.1**<br>(8.5)                 | 27.4<br>(11.4)    | 26.9<br>(10.1)   | 25.7<br>(12.1)   | 28.1<br>(11.8)                  |
| <b>Appetizers (g/day)</b>                        | 6.1<br>(10.4)                    | 5.1<br>(11.5)    | 6.5<br>(11.6)     | 3.0*<br>(5.8)    | 6.4<br>(17.3)               | 4.5<br>(13.2)                  | 9.3<br>(13.4)                 | 7.9<br>(15.0)                 | 2.8***<br>(6.6)               | 2.1**<br>(6.5)   | 6.8<br>(12.3)    | 6.4<br>(14.8)    | 3.3***<br>(7.4)  | 3.9<br>(8.1)                    | 6.8<br>(13.8)     | 6.9<br>(12.7)    | 7.5*<br>(16.4)   | 5.4<br>(11.5)                   |
| <b>Sugars and sweets (g/day)</b>                 | 12.2<br>(12.3)                   | 13.8<br>(13.4)   | 17.1<br>(14.0)    | 17.9<br>(16.1)   | 16.9<br>(16.4)              | 19.3<br>(19.6)                 | 12.8<br>(15.4)                | 16.0<br>(14.3)                | 16.0<br>(13.9)                | 14.9<br>(14.3)   | 14.8<br>(13.8)   | 16.5<br>(15.7)   | 20.2^<br>(19.7)  | 18.2<br>(15.6)                  | 18.9<br>(19.6)    | 20.3<br>(17.7)   | 11.0<br>(12.9)   | 14.4<br>(14.0)                  |
| <b>Alcoholic beverages (g/day)</b>               | 102.5<br>(167.7)                 | 26.8<br>(51.3)   | 202.9<br>(331.7)  | 66.5<br>(123.0)  | 124.7<br>(191.1)            | 101.8 <sup>oo</sup><br>(160.1) | 195.1<br>(238.4)              | 99.8 <sup>oo</sup><br>(165.6) | 129.9<br>(213.7)              | 53.3<br>(156.9)  | 117.1<br>(257.5) | 74.1<br>(157.0)  | 140.2<br>(276.2) | 53.8<br>(89.8)                  | 148.6<br>(222.1)  | 58.4<br>(126.7)  | 210.6<br>(312.2) | 71.9 <sup>oo</sup><br>(138.9)   |
| <b>Non-alcoholic beverages (g/day)</b>           | 851.3<br>(480.4)                 | 850.4<br>(519.3) | 798.8<br>(431.7)  | 929.7<br>(491.7) | 819.3<br>(481.4)            | 844.4<br>(435.0)               | 1010.2<br>(674.8)             | 1049.8<br>(537.8)             | 930.1<br>(528.8)              | 874.0<br>(470.8) | 920.4<br>(545.4) | 935.5<br>(597.1) | 778.5<br>(587.2) | 720.4 <sup>ooo</sup><br>(416.5) | 997.8<br>(526.1)  | 948.2<br>(585.1) | 798.0<br>(555.6) | 795.3 <sup>ooo</sup><br>(452.5) |
| <b>Meat and meat products (g/day)</b>            | 166.9<br>(78.6)                  | 137.0<br>(85.6)  | 143.3<br>(72.5)   | 98.2<br>(61.0)   | 160.2<br>(89.0)             | 112.3<br>(70.3)                | 178.7<br>(89.6)               | 128.9<br>(68.6)               | 183.3<br>(96.7)               | 137.6<br>(71.7)  | 179.7<br>(98.8)  | 125.6<br>(76.9)  | 142.6<br>(77.8)  | 133.5<br>(83.8)                 | 197.5**<br>(93.6) | 138.8<br>(79.2)  | 158.1<br>(87.6)  | 131.3<br>(68.1)                 |
| <b>Cereals/Grains (g/day)</b>                    | 170.6<br>(81.4)                  | 132.1<br>(53.7)  | 159.0<br>(56.9)   | 135.0<br>(52.3)  | 169.0<br>(69.2)             | 141.7<br>(61.2)                | 170.4<br>(68.4)               | 145.3<br>(57.8)               | 167.9<br>(72.5)               | 121.8<br>(53.4)  | 168.5<br>(72.5)  | 135.4<br>(54.9)  | 151.5<br>(69.6)  | 124.3<br>(59.5)                 | 163.6<br>(66.3)   | 136.5<br>(62.7)  | 154.8<br>(61.6)  | 136.0<br>(52.9)                 |
| <b>Fruits (g/day)</b>                            | 168.3<br>(159.0)                 | 191.6<br>(165.3) | 221.0<br>(253.3)  | 149.3<br>(165.2) | 131.9<br>(143.6)            | 138.8<br>(148.1)               | 167.4<br>(165.5)              | 172.7<br>(170.8)              | 141.0<br>(180.9)              | 174.0<br>(179.7) | 141.1<br>(167.9) | 120.0<br>(157.1) | 144.5<br>(174.9) | 184.8<br>(202.3)                | 175.4<br>(184.2)  | 179.0<br>(241.2) | 118.4<br>(138.2) | 125.6<br>(136.9)                |
| <b>Eggs (g/day)</b>                              | 23.8<br>(26.8)                   | 23.4<br>(25.3)   | 28.1<br>(27.1)    | 20.5<br>(20.6)   | 40.0 <sup>f</sup><br>(33.2) | 30.3<br>(26.5)                 | 26.4<br>(28.4)                | 27.2<br>(26.0)                | 33.1<br>(30.0)                | 26.4<br>(21.2)   | 34.6<br>(46.8)   | 23.5<br>(21.7)   | 38.6<br>(35.2)   | 28.7<br>(26.5)                  | 41.4<br>(34.5)    | 30.5<br>(28.8)   | 32.5<br>(31.0)   | 22.1<br>(24.9)                  |
| <b>Milk and dairy products (g/day)</b>           | 232.1<br>(171.4)                 | 232.4<br>(128.9) | 280.3<br>(200.5)  | 266.1<br>(172.7) | 265.4<br>(145.8)            | 273.0<br>(146.9)               | 212.9 <sup>+</sup><br>(183.4) | 250.1<br>(134.7)              | 283.4<br>(158.4)              | 252.4<br>(137.4) | 234.3<br>(201.7) | 221.7<br>(133.3) | 262.2<br>(160.9) | 260.7<br>(166.4)                | 273.7<br>(153.9)  | 292.2<br>(166.4) | 225.4<br>(141.0) | 229.5<br>(127.7)                |
| <b>Pulses (g/day)</b>                            | 11.5<br>(14.9)                   | 16.0<br>(20.9)   | 15.3<br>(19.0)    | 11.3<br>(17.5)   | 14.9<br>(21.1)              | 11.0<br>(13.9)                 | 10.7<br>(15.0)                | 11.7<br>(14.4)                | 15.0<br>(23.1)                | 12.0<br>(16.7)   | 16.7<br>(23.5)   | 10.7<br>(15.8)   | 13.1<br>(16.2)   | 14.0<br>(21.8)                  | 17.4<br>(20.2)    | 12.0<br>(16.6)   | 15.0<br>(17.6)   | 13.9<br>(16.3)                  |
| <b>Fish and shellfish (g/day)</b>                | 82.1<br>(91.0)                   | 90.0<br>(91.1)   | 51.7<br>(67.4)    | 45.6<br>(51.0)   | 62.0<br>(58.5)              | 65.6<br>(101.3)                | 65.7<br>(69.3)                | 61.0<br>(66.2)                | 52.9<br>(55.9)                | 65.8<br>(71.4)   | 48.4<br>(63.9)   | 48.7<br>(61.2)   | 67.5<br>(72.8)   | 67.2<br>(61.0)                  | 77.9<br>(85.7)    | 64.8<br>(64.3)   | 57.2<br>(65.1)   | 65.5<br>(70.5)                  |
| <b>Ready-to-eat meals (g/day)</b>                | 84.9<br>(87.9)                   | 50.2<br>(71.1)   | 67.0<br>(93.6)    | 50.5<br>(54.3)   | 75.5<br>(94.9)              | 71.7<br>(74.2)                 | 67.7<br>(79.7)                | 54.8<br>(58.7)                | 89.1<br>(89.2)                | 55.8<br>(61.0)   | 86.3<br>(94.2)   | 79.4<br>(74.4)   | 59.2<br>(78.9)   | 52.6<br>(58.2)                  | 52.0<br>(69.3)    | 52.7<br>(52.7)   | 75.5<br>(74.9)   | 68.8<br>(73.4)                  |
| <b>Sauces and condiments (g/day)</b>             | 13.6<br>(15.6)                   | 10.5<br>(10.4)   | 12.6<br>(12.3)    | 13.8<br>(11.2)   | 14.9<br>(15.4)              | 13.7<br>(16.1)                 | 17.0<br>(17.6)                | 12.9<br>(13.0)                | 13.8<br>(12.9)                | 9.1<br>(12.2)    | 16.9<br>(20.4)   | 10.9<br>(12.9)   | 11.9<br>(12.1)   | 9.6<br>(13.2)                   | 14.5<br>(15.4)    | 12.6<br>(14.0)   | 15.4<br>(16.2)   | 12.9<br>(14.6)                  |
| <b>Supplements and meal replacements (g/day)</b> | 0.1<br>(1.0)                     | 0.5<br>(2.1)     | 1.7<br>(6.3)      | 0.3<br>(1.5)     | 0.6<br>(3.6)                | 0.1<br>(1.2)                   | 0.0<br>(0.2)                  | 0.3<br>(1.7)                  | 0.0<br>(0.1)                  | 0.0<br>(0.0)     | 1.9<br>(15.3)    | 1.4<br>(11.7)    | 0.2<br>(1.2)     | 0.1<br>(0.8)                    | 0.1<br>(0.9)      | 0.6<br>(3.5)     | 0.6<br>(4.1)     | 0.0<br>(0.0)                    |
| <b>Vegetables (g/day)</b>                        | 169.4<br>(90.4)                  | 208.8<br>(128.2) | 209.6<br>(114.4)  | 179.5<br>(113.5) | 180.4<br>(120.6)            | 158.1<br>(108.3)               | 184.7<br>(123.8)              | 185.9<br>(112.3)              | 170.2<br>(103.3)              | 177.6<br>(108.4) | 206.9<br>(143.1) | 194.8<br>(125.8) | 182.2<br>(109.8) | 170.6<br>(97.3)                 | 202.6<br>(141.6)  | 204.0<br>(132.8) | 160.7<br>(107.7) | 166.9<br>(93.5)                 |

Data reported as means (standard error of the mean, SEM) per group. \* p<0.05 difference (Metropolitan Area) Madrid (male) (Games-Howell test); \*\*\* p<0.001 difference East (male) (Games-Howell test); ^ p<0.05 difference South (male) (Games-Howell test); \*\* p<0.01 difference Northwest (male) (Games-Howell test); \*p<0.05 difference East (male) (Games-Howell test); + p<0.05 difference (Metropolitan Area) Madrid (male) (Games-Howell test); \*\*p<0.01 difference South (female) (Games-Howell test); • p<0.05 difference East (female) (Games-Howell test); \*\* p<0.01 difference East (female) (Games-Howell test); <sup>oo</sup> p<0.01 difference Barcelona (Metropolitan Area (female) (Games-Howell test); <sup>ooo</sup> p<0.01 difference East (female) (Games-Howell test).

**Table S7. Intake of major food groups (g/day) from the ANIBES Study amongst adults (male/female, 18 to 64 years) assessed by habitat size: rural, semi-urban and urban.**

|                                                  | Rural                          |                  | Semi-urban       |                  | Urban                     |                  |
|--------------------------------------------------|--------------------------------|------------------|------------------|------------------|---------------------------|------------------|
|                                                  | Male                           | Female           | Male             | Female           | Male                      | Female           |
| <b>n</b>                                         | 266                            | 298              | 284              | 277              | 248                       | 282              |
| <b>Oils and Fats (g/day)</b>                     | 25.5**<br>(11.0)               | 25.0<br>(11.8)   | 26.0**<br>(11.8) | 24.1<br>(9.7)    | 22.6<br>(10.7)            | 24.3<br>(11.1)   |
| <b>Appetizers (g/day)</b>                        | 8.2*<br>(14.5)                 | 5.4<br>(11.8)    | 6.1<br>(13.0)    | 5.8<br>(12.7)    | 4.9<br>(12.0)             | 4.7<br>(11.6)    |
| <b>Sugars and sweets (g/day)</b>                 | 13.4<br>(14.4)                 | 17.9<br>(16.4)   | 16.6<br>(16.9)   | 15.7<br>(15.8)   | 14.4<br>(14.9)            | 15.4<br>(13.9)   |
| <b>Alcoholic beverages (g/day)</b>               | 189.6 <sup>x</sup><br>(293.3)  | 81.1<br>(156.1)  | 134.4<br>(212.1) | 59.8<br>(113.2)  | 155.2<br>(253.9)          | 70.2<br>(150.9)  |
| <b>Non-alcoholic beverages (g/day)</b>           | 829.6<br>(546.4)               | 876.0<br>(563.4) | 935.7<br>(552.3) | 891.7<br>(485.4) | 883.8<br>(583.8)          | 891.0<br>(476.7) |
| <b>Meat and meat products (g/day)</b>            | 169.6<br>(93.7)                | 123.8<br>(72.9)  | 168.9<br>(83.3)  | 129.2<br>(73.0)  | 169.1<br>(94.3)           | 134.5<br>(74.9)  |
| <b>Cereals/Grains (g/day)</b>                    | 164.1<br>(64.1)                | 137.1<br>(54.5)  | 168.3<br>(72.4)  | 135.5<br>(56.3)  | 158.1<br>(68.5)           | 132.0<br>(58.6)  |
| <b>Fruits (g/day)</b>                            | 150.3<br>(171.3)               | 147.1<br>(164.8) | 157.8<br>(166.0) | 147.6<br>(166.0) | 132.7<br>(165.7)          | 171.6<br>(186.4) |
| <b>Eggs (g/day)</b>                              | 33.6<br>(37.6)                 | 24.9<br>(25.4)   | 34.4<br>(31.4)   | 25.1<br>(23.5)   | 31.5<br>(30.7)            | 26.9<br>(25.6)   |
| <b>Milk and dairy products (g/day)</b>           | 221.5 <sup>##</sup><br>(168.0) | 243.5<br>(143.1) | 263.6<br>(154.3) | 260.8<br>(145.9) | 253.6<br>(177.1)          | 242.0<br>(139.0) |
| <b>Pulses (g/day)</b>                            | 15.7 <sup>+</sup><br>(19.4)    | 12.7<br>(16.6)   | 15.2<br>(20.8)   | 12.9<br>(16.2)   | 11.8<br>(16.9)            | 12.0<br>(17.5)   |
| <b>Fish and shellfish (g/day)</b>                | 59.5<br>(68.1)                 | 62.6<br>(65.6)   | 67.1<br>(72.6)   | 59.1<br>(60.4)   | 56.9<br>(64.0)            | 69.4<br>(87.5)   |
| <b>Ready-to-eat meals (g/day)</b>                | 67.3<br>(77.9)                 | 63.3<br>(65.6)   | 75.2<br>(86.7)   | 63.1<br>(66.3)   | 80.0<br>(87.3)            | 57.8<br>(67.6)   |
| <b>Sauces and condiments (g/day)</b>             | 14.1<br>(16.8)                 | 11.6<br>(13.7)   | 14.8<br>(14.7)   | 13.1<br>(13.6)   | 16.1<br>(16.3)            | 10.8<br>(12.9)   |
| <b>Supplements and meal replacements (g/day)</b> | 0.8<br>(9.1)                   | 0.1<br>(0.8)     | 0.7<br>(3.8)     | 0.4<br>(2.4)     | 0.1 <sup>^</sup><br>(0.8) | 0.6<br>(7.1)     |
| <b>Vegetables (g/day)</b>                        | 185.4<br>(125.6)               | 177.3<br>(107.3) | 182.8<br>(124.2) | 177.8<br>(113.2) | 174.3<br>(104.0)          | 188.8<br>(116.1) |

Data reported as means (standard error of the mean, SEM) per group. \*\* p<0.01 difference Urban (Games-Howell test); \*p<0.05 difference Urban (Games-Howell test); <sup>x</sup> p<0.05 difference semi-urban (Games-Howell test); <sup>##</sup> p<0.01 difference semi-urban (Games-Howell test); <sup>+</sup> p<0.05 difference Urban (Games-Howell test); <sup>^</sup> p<0.05 difference Urban (Games-Howell test).

**Table S8. Intake of major food groups (g/day) from the ANIBES Study amongst senior population (male/female, 65 to 75 years) segmented by geographical areas (Nielsen areas).**

|                                                  | Barcelona<br>(Metropolitan Area) |                  | Canary<br>Islands |                  | Center           |                   | East             |                  | Madrid<br>(Metropolitan Area) |                               | Northeast        |                   | Northwest        |                  | North Central     |                  | South            |                              |
|--------------------------------------------------|----------------------------------|------------------|-------------------|------------------|------------------|-------------------|------------------|------------------|-------------------------------|-------------------------------|------------------|-------------------|------------------|------------------|-------------------|------------------|------------------|------------------------------|
|                                                  | Male                             | Female           | Male              | Female           | Male             | Female            | Male             | Female           | Male                          | Female                        | Male             | Female            | Male             | Female           | Male              | Female           | Male             | Female                       |
| <b>n</b>                                         | 2                                | 6                | 7                 | 4                | 7                | 5                 | 12               | 14               | 11                            | 16                            | 9                | 11                | 11               | 9                | 12                | 10               | 28               | 32                           |
| <b>Oils and Fats (g/day)</b>                     | 39.6<br>(15.0)                   | 29.4<br>(6.5)    | 31.8<br>(25.2)    | 14.8<br>(4.7)    | 22.9<br>(7.1)    | 21.4<br>(7.6)     | 23.6<br>(6.5)    | 22.2<br>(11.8)   | 24.4<br>(6.6)                 | 20.5<br>(10.5)                | 29.1<br>(13.3)   | 26.6<br>(11.6)    | 24.9<br>(8.8)    | 19.1<br>(7.7)    | 30.2<br>(8.7)     | 39.1<br>(22.8)   | 29.7<br>(16.9)   | 29.1*<br>(11.9)              |
| <b>Appetizers (g/day)</b>                        | 3.3<br>(4.7)                     | 15.4<br>(35.1)   | 2.6<br>(4.1)      | 0.3<br>(0.7)     | 0.8<br>(1.4)     | 0.0<br>(0.0)      | 1.7<br>(3.2)     | 2.6<br>(5.5)     | 2.4<br>(5.4)                  | 1.4<br>(4.1)                  | 1.9<br>(5.8)     | 5.5<br>(10.5)     | 7.5<br>(17.0)    | 0.0<br>(0.0)     | 1.7<br>(2.6)      | 2.0<br>(2.8)     | 4.6<br>(10.0)    | 1.5<br>(4.2)                 |
| <b>Sugars and sweets (g/day)</b>                 | 8.5<br>(12.0)                    | 8.6<br>(8.2)     | 13.0<br>(20.0)    | 6.7<br>(8.3)     | 8.1<br>(12.1)    | 24.0<br>(16.7)    | 10.4<br>(10.8)   | 16.5<br>(14.6)   | 16.6<br>(18.5)                | 7.9<br>(9.3)                  | 14.7<br>(16.5)   | 10.6<br>(12.5)    | 11.6<br>(11.6)   | 9.6<br>(9.8)     | 17.6<br>(20.6)    | 28.5<br>(18.1)   | 11.3<br>(8.7)    | 7.3<br>(10.0)                |
| <b>Alcoholic beverages (g/day)</b>               | 339.2<br>(147.3)                 | 56.7<br>(78.3)   | 23.8<br>(49.9)    | 41.7<br>(83.3)   | 96.7<br>(192.6)  | 20.0<br>(44.7)    | 126.1<br>(181.2) | 33.6<br>(77.9)   | 103.3<br>(156.8)              | 21.0<br>(45.3)                | 41.1<br>(73.3)   | 59.8<br>(66.7)    | 184.8<br>(169.6) | 24.7<br>(38.0)   | 181.4<br>(212.3)  | 147.3<br>(232.8) | 194.6<br>(227.1) | 58.9<br>(89.0)               |
| <b>Non-alcoholic beverages (g/day)</b>           | 652.5<br>(203.9)                 | 865.0<br>(250.4) | 740.9<br>(147.2)  | 752.2<br>(227.9) | 733.1<br>(754.7) | 1318.5<br>(526.3) | 770.8<br>(353.1) | 873.3<br>(313.9) | 596.5<br>(257.2)              | 740.8<br>(374.1)              | 748.3<br>(523.2) | 1008.5<br>(669.8) | 289.9<br>(195.6) | 413.6<br>(303.9) | 846.0<br>(518.7)  | 860.3<br>(537.6) | 569.0<br>(406.2) | 580.3<br>(289.2)             |
| <b>Meat and meat products (g/day)</b>            | 205.8<br>(24.7)                  | 79.0<br>(65.5)   | 146.7<br>(129.7)  | 47.1<br>(38.0)   | 127.6<br>(88.2)  | 90.3<br>(46.7)    | 112.9<br>(83.7)  | 82.4<br>(52.9)   | 167.1<br>(62.1)               | 113.8<br>(64.4)               | 156.5<br>(50.4)  | 123.8<br>(84.2)   | 112.0<br>(54.1)  | 110.4<br>(36.6)  | 150.8<br>(58.7)   | 96.6<br>(44.9)   | 112.2<br>(76.9)  | 111.9<br>(63.9)              |
| <b>Cereals/Grains (g/day)</b>                    | 221.8<br>(32.8)                  | 111.8<br>(50.7)  | 191.6<br>(54.8)   | 130.9<br>(64.9)  | 127.4<br>(45.8)  | 88.2<br>(26.8)    | 139.7<br>(95.6)  | 114.9<br>(46.5)  | 113.8<br>(37.9)               | 116.8<br>(35.1)               | 155.9<br>(58.9)  | 89.4<br>(46.4)    | 105.0<br>(49.5)  | 113.0<br>(43.3)  | 133.5<br>(53.1)   | 139.1<br>(56.0)  | 136.4<br>(45.1)  | 122.7<br>(44.1)              |
| <b>Fruits (g/day)</b>                            | 205.0<br>(77.8)                  | 255.2<br>(72.1)  | 261.5<br>(206.4)  | 451.8<br>(159.2) | 422.1<br>(239.3) | 215.2<br>(114.9)  | 337.3<br>(246.8) | 349.1<br>(156.8) | 360.4<br>(271.7)              | 262.0<br>(165.8)              | 365.8<br>(270.1) | 242.9<br>(138.3)  | 120.1<br>(103.7) | 213.6<br>(155.4) | 434.8<br>(314.4)  | 458.4<br>(347.2) | 163.6<br>(172.5) | 236.1<br>(198.2)             |
| <b>Eggs (g/day)</b>                              | 73.7<br>(58.9)                   | 59.4<br>(41.5)   | 49.0<br>(24.7)    | 10.8<br>(11.5)   | 25.9<br>(18.5)   | 26.3<br>(18.0)    | 29.1<br>(21.8)   | 11.5<br>(13.6)   | 23.7<br>(33.8)                | 20.1<br>(21.9)                | 15.2<br>(20.2)   | 29.7<br>(22.8)    | 39.4<br>(35.0)   | 46.1<br>(34.7)   | 62.1**<br>(29.3)  | 40.6<br>(42.1)   | 29.3<br>(23.0)   | 34.0*<br>(26.0)              |
| <b>Milk and dairy products (g/day)</b>           | 0.0<br>(0.0)                     | 173.4<br>(46.7)  | 289.0<br>(171.4)  | 363.3<br>(279.5) | 285.4<br>(83.3)  | 266.2<br>(103.5)  | 247.9<br>(174.5) | 263.9<br>(181.6) | 243.1<br>(168.8)              | 399.4**<br>(170.8)            | 241.2<br>(100.4) | 215.8<br>(129.3)  | 202.6<br>(162.5) | 271.1<br>(135.2) | 345.3<br>(215.6)  | 258.5<br>(187.1) | 206.3<br>(132.7) | 261.1<br>(124.4)             |
| <b>Pulses (g/day)</b>                            | 11.7<br>(16.5)                   | 18.6<br>(15.6)   | 17.9<br>(21.4)    | 29.6<br>(25.3)   | 17.1<br>(24.1)   | 18.0<br>(10.7)    | 14.0<br>(18.0)   | 19.4<br>(30.3)   | 9.7<br>(10.1)                 | 12.0<br>(11.6)                | 20.6<br>(22.8)   | 10.3<br>(20.9)    | 13.3<br>(14.6)   | 12.6<br>(9.7)    | 13.5<br>(23.5)    | 8.5<br>(12.7)    | 24.2<br>(22.1)   | 10.2<br>(11.3)               |
| <b>Fish and shellfish (g/day)</b>                | 86.5<br>(1.6)                    | 72.2<br>(49.3)   | 41.4<br>(66.2)    | 44.8<br>(76.5)   | 120.2<br>(103.1) | 39.3<br>(16.9)    | 80.5<br>(53.7)   | 48.0<br>(44.7)   | 105.9<br>(88.0)               | 72.6<br>(59.5)                | 132.3<br>(100.0) | 111.4<br>(71.6)   | 84.5<br>(66.2)   | 54.8<br>(72.9)   | 99.5<br>(103.3)   | 98.4<br>(108.6)  | 78.3<br>(57.2)   | 75.4<br>(65.3)               |
| <b>Ready-to-eat meals (g/day)</b>                | 41.7<br>(58.9)                   | 38.9<br>(37.5)   | 114.3<br>(137.7)  | 39.6<br>(55.0)   | 98.8<br>(101.9)  | 11.7<br>(16.2)    | 40.8<br>(39.6)   | 46.9<br>(67.8)   | 65.2<br>(69.3)                | 38.5<br>(46.7)                | 80.9<br>(80.4)   | 35.3<br>(47.6)    | 60.3<br>(67.9)   | 54.4<br>(53.1)   | 69.4<br>(58.6)    | 60.7<br>(102.3)  | 91.1<br>(67.0)   | 52.0<br>(57.5)               |
| <b>Sauces and condiments (g/day)</b>             | 0.5<br>(0.3)                     | 1.7<br>(1.7)     | 5.1<br>(7.6)      | 6.5<br>(5.2)     | 7.4<br>(6.6)     | 1.2<br>(1.3)      | 9.3<br>(9.0)     | 3.0<br>(3.8)     | 14.0<br>(17.5)                | 6.3<br>(8.7)                  | 4.2<br>(6.4)     | 10.1<br>(11.6)    | 3.7<br>(4.2)     | 2.8<br>(2.9)     | 14.1<br>(22.0)    | 5.4<br>(6.7)     | 5.0<br>(6.7)     | 8.7<br>(11.5)                |
| <b>Supplements and meal replacements (g/day)</b> | 0.0<br>(0.0)                     | 0.0<br>(0.0)     | 0.0<br>(0.0)      | 0.0<br>(0.0)     | 0.0<br>(0.0)     | 0.0<br>(0.0)      | 0.6<br>(1.9)     | 0.0<br>(0.0)     | 0.0<br>(0.0)                  | 0.0<br>(0.0)                  | 0.0<br>(0.0)     | 0.0<br>(0.0)      | 0.0<br>(0.0)     | 0.0<br>(0.0)     | 8.7<br>(23.0)     | 0.3<br>(1.1)     | 0.0<br>(0.0)     | 0.1<br>(0.5)                 |
| <b>Vegetables (g/day)</b>                        | 319.2<br>(104.9)                 | 250.3<br>(124.1) | 178.9<br>(113.0)  | 251.5<br>(133.1) | 197.2<br>(77.7)  | 195.9<br>(123.0)  | 241.6<br>(132.9) | 178.5<br>(115.8) | 211.5<br>(79.8)               | 181.4 <sup>o</sup><br>(100.7) | 259.3<br>(111.5) | 254.6<br>(88.8)   | 208.3<br>(104.1) | 228.0<br>(106.6) | 294.9*<br>(100.8) | 342.3<br>(118.7) | 164.0<br>(92.8)  | 153.4 <sup>o</sup><br>(79.1) |

Data reported as means (standard error of the mean, SEM) per group. \*\* p<0.05 difference Northeast (Games-Howell test); + p<0.05 difference South (Games-Howell test). \* p<0.05 difference Canary (Games-Howell test); # p<0.05 difference East (Games-Howell test); ●● p<0.01 difference Northcentral (Games-Howell test) <sup>o</sup> p<0.05 difference Northcentral (Games-Howell test).



**Table S9. Intake of major food groups (g/day) from the ANIBES Study amongst seniors (male/female, 65 to 75 years) assessed by habitat size: rural, semi-urban and urban.**

|                                                  | Rural            |                  | Semi-urban       |                  | Urban            |                  |
|--------------------------------------------------|------------------|------------------|------------------|------------------|------------------|------------------|
|                                                  | Male             | Female           | Male             | Female           | Male             | Female           |
| <b>n</b>                                         | 40               | 32               | 31               | 40               | 28               | 35               |
| <b>Oils and Fats (g/day)</b>                     | 29.7<br>(13.0)   | 26.1<br>(16.3)   | 25.1<br>(11.3)   | 26.3<br>(11.7)   | 27.7<br>(15.3)   | 25.1<br>(12.3)   |
| <b>Appetizers (g/day)</b>                        | 4.1<br>(11.3)    | 2.5<br>(6.9)     | 2.4<br>(4.0)     | 1.2<br>(3.3)     | 3.2<br>(7.0)     | 4.3<br>(15.0)    |
| <b>Sugars and sweets (g/day)</b>                 | 13.1<br>(13.9)   | 12.5<br>(14.4)   | 10.2<br>(12.7)   | 11.3<br>(12.8)   | 14.9<br>(15.5)   | 12.2<br>(13.4)   |
| <b>Alcoholic beverages (g/day)</b>               | 154.5<br>(192.4) | 55.2<br>(138.4)  | 160.8<br>(221.9) | 50.8<br>(86.7)   | 108.5<br>(140.4) | 52.9<br>(76.0)   |
| <b>Non-alcoholic beverages (g/day)</b>           | 587.5<br>(427.3) | 860.4<br>(518.0) | 680.0<br>(457.4) | 670.7<br>(415.8) | 673.7<br>(407.4) | 757.0<br>(358.8) |
| <b>Meat and meat products (g/day)</b>            | 129.6<br>(65.1)  | 106.9<br>(42.3)  | 135.4<br>(89.4)  | 93.0<br>(58.8)   | 133.4<br>(77.2)  | 110.0<br>(75.9)  |
| <b>Cereals/Grains (g/day)</b>                    | 133.6<br>(61.7)  | 116.1<br>(45.3)  | 142.8<br>(61.9)  | 113.9<br>(51.7)  | 136.2<br>(53.2)  | 118.8<br>(38.7)  |
| <b>Fruits (g/day)</b>                            | 271.5<br>(237.0) | 281.8<br>(157.0) | 254.6<br>(256.3) | 314.2<br>(253.0) | 316.7<br>(247.5) | 247.0<br>(160.6) |
| <b>Eggs (g/day)</b>                              | 35.4<br>(28.8)   | 25.9<br>(20.4)   | 36.4<br>(27.7)   | 35.8<br>(31.9)   | 31.2<br>(33.2)   | 28.3<br>(31.7)   |
| <b>Milk and dairy products (g/day)</b>           | 250.4<br>(133.6) | 282.2<br>(157.5) | 248.3<br>(205.0) | 297.6<br>(144.7) | 224.1<br>(139.7) | 249.3<br>(173.4) |
| <b>Pulses (g/day)</b>                            | 18.0**<br>(19.3) | 12.6<br>(20.4)   | 26.0**<br>(23.5) | 14.3<br>(16.1)   | 6.6<br>(9.7)     | 12.7<br>(14.9)   |
| <b>Fish and shellfish (g/day)</b>                | 88.4<br>(71.6)   | 65.4<br>(74.1)   | 79.9<br>(87.7)   | 75.8<br>(68.8)   | 104.6<br>(71.2)  | 75.3<br>(61.4)   |
| <b>Ready-to-eat meals (g/day)</b>                | 72.4<br>(69.1)   | 49.9<br>(50.3)   | 77.4<br>(74.6)   | 35.5<br>(59.8)   | 80.8<br>(83.8)   | 53.0<br>(64.1)   |
| <b>Sauces and condiments (g/day)</b>             | 5.9<br>(8.5)     | 4.7<br>(7.1)     | 7.4<br>(13.9)    | 4.8<br>(7.2)     | 9.9<br>(12.7)    | 8.8<br>(11.2)    |
| <b>Supplements and meal replacements (g/day)</b> | 0.6<br>(2.7)     | 0.0<br>(0.0)     | 2.6<br>(14.4)    | 0.1<br>(0.5)     | 0.2<br>(1.3)     | 0.1<br>(0.5)     |
| <b>Vegetables (g/day)</b>                        | 222.0<br>(102.1) | 213.2<br>(112.0) | 191.7<br>(96.8)  | 216.1<br>(117.6) | 229.6<br>(126.3) | 188.8<br>(109.6) |

Data reported as means (standard error of the mean, SEM) per group. \*\* p<0.01 difference Urban (Games-Howell test).
